# Supplementary material for: Identification and Characterization of MicroRNAs in Normal Equine Tissues by Next Generation Sequencing
Source: PLoS One. 2014 Apr 2;9(4):e93662. doi: 10.1371/journal.pone.0093662 (PMC3973549; doi:10.1371/journal.pone.0093662)
Supplement: Table S2 — Distribution of the genome-mapped sequence reads in small RNA libraries. (XLSX) [file pone.0093662.s002.xlsx]

## Sheet: Sheet1
Table_S2: Distribution of the genome-mapped sequence reads in small RNA libraries
	Equine muscle tissue_1		Equine muscle tissue_3		Equine muscle tissue_8		Equine muscle tissue_10		Equine colon tissue_2		Equine colon tissue_4		Equine colon tissue_6		Equine colon tissue_12		Equine liver tissue_5		Equine liver tissue_7		Equine liver tissue_9		Equine liver tissue_11
Category	Unique sRNAs	Total Reads	Unique sRNAs	Total Reads	Unique sRNAs	Total Reads	Unique sRNAs	Total Reads	Unique sRNAs	Total Reads	Unique sRNAs	Total Reads	Unique sRNAs	Total Reads	Unique sRNAs	Total Reads	Unique sRNAs	Total Reads	Unique sRNAs	Total Reads	Unique sRNAs	Total Reads	Unique sRNAs	Total Reads
Exon antisense	85 (0.02%)	91 (0.00%)	120 (0.03%)	153 (0.00%)	221 (0.04%)	266 (0.00%)	180 (0.04%)	280 (0.00%)	593 (0.07%)	672 (0.00%)	704 (0.06%)	889 (0.00%)	154 (0.08%)	159 (0.00%)	371 (0.04%)	419 (0.00%)	81 (0.03%)	94 (0.00%)	52 (0.05%)	63 (0.00%)	50 (0.02%)	58 (0.00%)	107 (0.03%)	111 (0.00%)
	0.0002	0	0.0003	0	0.0004	0	0.0004	0	0.0007	0	0.0006	0	0.0008	0	0.0004	0	0.0003	0	0.0005	0	0.0002	0	0.0003	0
Exon sense	11064	12297	39368	48279	65716	78395	58578	71925	130214	174542	207769	362164	6125	6908	142269	249416	9513	10261	3084	3507	1561	1761	9575	10560
	0.0253	0.0006	0.1	0.0025	0.1173	0.0046	0.128	0.0039	0.1578	0.0095	0.177	0.0172	0.0338	0.0004	0.1643	0.0221	0.0404	0.0006	0.0316	0.0002	0.0057	0.0001	0.0297	0.0008
Intron antisense	1162	3958	1862	4086	2134	3937	2251	5357	4629	6940	8889	26371	1125	1861	6458	16322	570	1267	361	810	278	509	672	1009
	0.0027	0.0002	0.0047	0.0002	0.0038	0.0002	0.0049	0.0003	0.0056	0.0004	0.0076	0.0013	0.0062	0.0001	0.0075	0.0014	0.0024	0.0001	0.0037	0	0.001	0	0.0021	0.0001
Intron sense	3892	72352	4976	57416	6664	43530	7743	49781	18341	133019	28914	147250	3612	168831	16278	99989	2359	110360	1644	95244	1134	55655	2313	56224
	0.0089	0.0034	0.0126	0.003	0.0119	0.0025	0.017	0.0027	0.0222	0.0073	0.0246	0.007	0.0199	0.0101	0.0188	0.0089	0.01	0.006	0.0168	0.0051	0.0042	0.0042	0.0072	0.0043
miRNA	2492	16675841	1976	14524748	1880	13310949	1750	14824532	2775	8129415	2825	8468135	3182	11916716	2824	4604185	2203	10637210	2446	1303975	2007	7555711	2000	6966659
	0.0057	0.776	0.005	0.7549	0.0034	0.7794	0.0038	0.8134	0.0034	0.4446	0.0024	0.4021	0.0176	0.7134	0.0033	0.4081	0.0094	0.5762	0.0251	0.6934	0.0074	0.5673	0.0062	0.5352
rRNA	44164	175177	34376	190188	18660	79801	13898	44043	29397	247387	32952	524256	22270	148973	34119	145819	8321	39387	10746	46018	6770	16880	7579	20912
	0.109	0.0082	0.0874	0.0099	0.0333	0.0047	0.0304	0.0024	0.0356	0.0135	0.0281	0.0249	0.1228	0.0089	0.0394	0.0129	0.0353	0.0021	0.1101	0.0024	0.0248	0.0013	0.0235	0.0016
repeat	2359	4459	2873	4484	5014	7173	5189	7963	11125	16884	17266	26337	1966	2941	11266	15068	1548	2962	1058	1417	757	1806	1992	3278
	0.0054	0.0002	0.0073	0.0002	0.009	0.0004	0.0114	0.0004	0.0135	0.0009	0.0147	0.0013	0.0108	0.0002	0.013	0.0013	0.0066	0.0002	0.0108	0.0001	0.0028	0.0001	0.0062	0.0003
scRNA	336	23009	237	5838	264	5285	240	5510	457	82028	509	55288	321	25732	486	21356	297	13147	222	5940	204	4598	239	6637
	0.0008	0.0011	0.0006	0.0003	0.0005	0.0003	0.0005	0.0003	0.0006	0.0045	0.0004	0.0026	0.0018	0.0015	0.0006	0.0019	0.0013	0.0007	0.0023	0.0003	0.0007	0.0003	0.0007	0.0005
snRNA	1225	10016	800	7652	1504	3228	1073	2088	3318	16592	3140	18187	813	3989	3376	10210	798	2789	472	1904	417	1434	768	1919
	0.0028	0.0005	0.002	0.0004	0.0027	0.0002	0.0024	0.0001	0.004	0.0009	0.0027	0.0009	0.0045	0.0002	0.0039	0.0009	0.0034	0.0002	0.0048	0.0001	0.0015	0.0001	0.0024	0.0001
snoRNA	1156	6720	747	2982	973	4586	770	2695	2339	20490	2262	16607	946	11738	2452	13269	1413	14526	744	6885	877	7522	1105	11657
	0.0026	0.0003	0.0019	0.0002	0.0017	0.0003	0.0017	0.0001	0.0028	0.0011	0.0019	0.0008	0.0052	0.0007	0.0028	0.0012	0.006	0.0008	0.0076	0.0004	0.0032	0.0006	0.0034	0.0009
srpRNA	341	2205	272	5102	427	4991	249	1289	888	24780	901	42525	358	1054	620	11076	200	569	201	384	134	189	138	741
	0.0008	0.0001	0.0007	0.0003	0.0008	0.0003	0.0005	0.0001	0.0011	0.0014	0.0008	0.002	0.002	0.0001	0.0007	0.001	0.0008	0	0.0021	0	0.0005	0	0.0004	0.0001
tRNA	28742	607640	19725	800333	18838	259744	11800	157383	30659	838550	28236	963532	6725	73803	37249	1803749	8204	123967	4294	44349	2964	19660	11496	241624
	0.0656	0.0283	0.0501	0.0416	0.0336	0.0152	0.0258	0.0086	0.0372	0.0459	0.024	0.0458	0.0371	0.0044	0.043	0.1599	0.0348	0.0067	0.044	0.0024	0.0145	0.0015	0.0357	0.0186
Unknown	340825	3896175	286164	3590176	437793	3276558	352775	3053889	590525	8592102	839713	10407641	133691	4340878	608119	4290025	199907	750287	72315	5556415	254450	5653029	284358	5695677
	0.7784	0.1813	0.7272	0.1866	0.7817	0.1919	0.7728	0.1676	0.7156	0.4699	0.7152	0.4924	0.7375	0.2599	0.7023	0.3803	0.8492	0.4065	0.7406	0.2957	0.9334	0.4244	0.8822	0.4376
Total Reads	437843	21489940	393496	19241437	560088	17078443	456496	18226455	823260	18283401	1174080	21051982	181288	16703583	865887	11280903	235414	18461826	97639	18793891	272603	13318812	322342	13017008
	1	1	1	1	1	1	1	1	1	1	1	1	1	1	1	1	1	1	1	1	1	1	1	1

## Sheet: Sheet2
	Equine muscle tissue_1		Equine muscle tissue_3		Equine muscle tissue_8		Equine muscle tissue_10		Equine colon tissue_2		Equine colon tissue_4		Equine colon tissue_6		Equine colon tissue_12		Equine liver tissue_5		Equine liver tissue_7		Equine liver tissue_9		Equine liver tissue_11
	Unique sRNAs	Total Reads	Unique sRNAs	Total Reads	Unique sRNAs	Total Reads	Unique sRNAs	Total Reads	Unique sRNAs	Total Reads	Unique sRNAs	Total Reads	Unique sRNAs	Total Reads	Unique sRNAs	Total Reads	Unique sRNAs	Total Reads	Unique sRNAs	Total Reads	Unique sRNAs	Total Reads	Unique sRNAs	Total Reads
Exon antisense	85	91	120	153	221	266	180	280	593	672	704	889	154	159	371	419	81	94	52	63	50	58	107	111
Exon sense	11064	12297	39368	48279	65716	78395	58578	71925	130214	174542	207769	362164	6125	6908	142269	249416	9513	10261	3084	3507	1561	1761	9575	10560
Intron antisense	1162	3958	1862	4086	2134	3937	2251	5357	4629	6940	8889	26371	1125	1861	6458	16322	570	1267	361	810	278	509	672	1009
Intron sense	3892	72352	4976	57416	6664	43530	7743	49781	18341	133019	28914	147250	3612	168831	16278	99989	2359	110360	1644	95244	1134	55655	2313	56224
miRNA	2492	16675841	1976	14524748	1880	13310949	1750	14824532	2775	8129415	2825	8468135	3182	11916716	2824	4604185	2203	10637210	2446	1303975	2007	7555711	2000	6966659
rRNA	44164	175177	34376	190188	18660	79801	13898	44043	29397	247387	32952	524256	22270	148973	34119	145819	8321	39387	10746	46018	6770	16880	7579	20912
repeat	2359	4459	2873	4484	5014	7173	5189	7963	11125	16884	17266	26337	1966	2941	11266	15068	1548	2962	1058	1417	757	1806	1992	3278
scRNA	336	23009	237	5838	264	5285	240	5510	457	82028	509	55288	321	25732	486	21356	297	13147	222	5940	204	4598	239	6637
snRNA	1225	10016	800	7652	1504	3228	1073	2088	3318	16592	3140	18187	813	3989	3376	10210	798	2789	472	1904	417	1434	768	1919
snoRNA	1156	6720	747	2982	973	4586	770	2695	2339	20490	2262	16607	946	11738	2452	13269	1413	14526	744	6885	877	7522	1105	11657
srpRNA	341	2205	272	5102	427	4991	249	1289	888	24780	901	42525	358	1054	620	11076	200	569	201	384	134	189	138	741
tRNA	28742	607640	19725	800333	18838	259744	11800	157383	30659	838550	28236	963532	6725	73803	37249	1803749	8204	123967	4294	44349	2964	19660	11496	241624
Unknown	340825	3896175	286164	3590176	437793	3276558	352775	3053889	590525	8592102	839713	10407641	133691	4340878	608119	4290025	199907	750287	72315	5556415	254450	5653029	284358	5695677
Total Reads	437843	21489940	393496	19241437	560088	17078443	456496	18226455	823260	18283401	1174080	21051982	181288	16703583	865887	11280903	235414	18461826	97639	18793891	272603	13318812	322342	13017008

## Sheet: Sheet3
	Equine muscle tissue_1				Equine muscle tissue_3				Equine muscle tissue_8				Equine muscle tissue_10				Equine colon tissue_2				Equine colon tissue_4				Equine colon tissue_6				Equine colon tissue_12				Equine liver tissue_5				Equine liver tissue_7				Equine liver tissue_9				Equine liver tissue_11
	Unique sRNAs		Total Reads		Unique sRNAs		Total Reads		Unique sRNAs		Total Reads		Unique sRNAs		Total Reads		Unique sRNAs		Total Reads		Unique sRNAs		Total Reads		Unique sRNAs		Total Reads		Unique sRNAs		Total Reads		Unique sRNAs		Total Reads		Unique sRNAs		Total Reads		Unique sRNAs		Total Reads		Unique sRNAs		Total Reads
Exon antisense	85	0.0194134	91	0.000423454	120	0.0304959	153	0.000795159	221	0.0394581	266	0.00155752	180	0.0394308	280	0.00153623	593	0.0720307	672	0.00367546	704	0.0599618	889	0.00422288	154	0.0849477	159	0.000951892	371	0.0428462	419	0.00371424	81	0.0344075	94	0.00080295	52	0.0532574	63	0.000891479	50	0.0184092	58	0.000435474	107	0.0331946	111	0.000852731
Exon sense	11064	2.52693	12297	0.0572221	39368	10.0047	48279	0.250912	65716	11.7332	78395	0.459029	58578	12.8321	71925	0.394619	130214	15.8169	174542	0.954647	207769	17.6963	362164	1.72033	6125	3.3786	6908	0.0413564	142269	16.4304	249416	2.21096	9513	4.04097	10261	0.0876497	3084	3.15857	3507	0.0496256	1561	0.574736	1761	0.0132219	9575	2.97045	10560	0.0811246
Intron antisense	1162	0.265392	3958	0.0184179	1862	0.473194	4086	0.0212354	2134	0.381012	3937	0.0230525	2251	0.493104	5357	0.0293913	4629	0.562277	6940	0.0379579	8889	0.757103	26371	0.125266	1125	0.62056	1861	0.0111413	6458	0.745825	16322	0.144687	570	0.242127	1267	0.0108227	361	0.369729	810	0.0114619	278	0.102355	509	0.00382166	672	0.208474	1009	0.0077514
Intron sense	3892	0.888903	72352	0.336678	4976	1.26456	57416	0.298398	6664	1.18981	43530	0.254883	7743	1.69618	49781	0.273125	18341	2.22785	133019	0.72754	28914	2.46269	147250	0.699459	3612	1.99241	168831	1.01075	16278	1.87992	99989	0.886356	2359	1.00206	110360	0.942698	1644	1.68375	95244	1.34775	1134	0.417521	55655	0.417868	2313	0.717561	56224	0.431927
miRNA	2492	0.569154	16675841	77.5984	1976	0.502165	14524748	75.4868	1880	0.335662	13310949	77.9401	1750	0.383355	14824532	81.3352	2775	0.337075	8129415	44.4634	2825	0.240614	8468135	40.2249	3182	1.75522	11916716	71.3423	2824	0.32614	4604185	40.814	2203	0.935798	10637210	90.8633	2446	2.50515	1303975	18.4518	2007	0.738946	7555711	56.7296	2000	0.620459	6966659	53.5197
rRNA	44164	10.0867	175177	0.815158	34376	8.73605	190188	0.988429	18660	3.33162	79801	0.467262	13898	3.0445	44043	0.241643	29397	3.5708	247387	1.35307	32952	2.80662	524256	2.49029	22270	12.2843	148973	0.891863	34119	3.94035	145819	1.29262	8321	3.53462	39387	0.336445	10746	11.0058	46018	0.651176	6770	2.49261	16880	0.126738	7579	2.35123	20912	0.160651
repeat	2359	0.538778	4459	0.0207492	2873	0.730122	4484	0.0233039	5014	0.895216	7173	0.0420003	5189	1.1367	7963	0.0436892	11125	1.35133	16884	0.0923461	17266	1.4706	26337	0.125105	1966	1.08446	2941	0.017607	11266	1.30109	15068	0.133571	1548	0.657565	2962	0.0253015	1058	1.08358	1417	0.0200512	757	0.278716	1806	0.0135598	1992	0.617977	3278	0.0251824
scRNA	336	0.0767398	23009	0.107069	237	0.0602293	5838	0.0303408	264	0.0471355	5285	0.0309454	240	0.0525744	5510	0.0302308	457	0.055511	82028	0.448647	509	0.0433531	55288	0.262626	321	0.177066	25732	0.154051	486	0.0561274	21356	0.189311	297	0.126161	13147	0.112302	222	0.227368	5940	0.0840537	204	0.0751096	4598	0.0345226	239	0.0741449	6637	0.0509871
snRNA	1225	0.279781	10016	0.0466079	800	0.203306	7652	0.0397683	1504	0.268529	3228	0.018901	1073	0.235051	2088	0.0114559	3318	0.403032	16592	0.090749	3140	0.267443	18187	0.0863909	813	0.448458	3989	0.0238811	3376	0.389889	10210	0.0905069	798	0.338977	2789	0.0238237	472	0.483413	1904	0.0269425	417	0.153533	1434	0.0107667	768	0.238256	1919	0.0147423
snoRNA	1156	0.264022	6720	0.0312704	747	0.189837	2982	0.0154978	973	0.173723	4586	0.0268526	770	0.168676	2695	0.0147862	2339	0.284114	20490	0.112069	2262	0.192661	16607	0.0788857	946	0.521822	11738	0.0702723	2452	0.283178	13269	0.117624	1413	0.600219	14526	0.124081	744	0.761991	6885	0.0974259	877	0.322898	7522	0.0564765	1105	0.342804	11657	0.0895521
srpRNA	341	0.0778818	2205	0.0102606	272	0.069124	5102	0.0265157	427	0.076238	4991	0.029224	249	0.0545459	1289	0.00707214	888	0.107864	24780	0.135533	901	0.0767409	42525	0.202	358	0.197476	1054	0.00631002	620	0.0716029	11076	0.0981836	200	0.0849567	569	0.00486041	201	0.20586	384	0.00543377	134	0.0493367	189	0.00141905	138	0.0428117	741	0.00569255
tRNA	28742	6.56445	607640	2.82756	19725	5.01276	800333	4.15942	18838	3.3634	259744	1.52089	11800	2.58491	157383	0.863487	30659	3.7241	838550	4.5864	28236	2.40495	963532	4.57692	6725	3.70957	73803	0.441839	37249	4.30183	1803749	15.9894	8204	3.48492	123967	1.05893	4294	4.39783	44349	0.627558	2964	1.0913	19660	0.147611	11496	3.5664	241624	1.85622
Unknown	340825	77.8418	3896175	18.1302	286164	72.7235	3590176	18.6586	437793	78.165	3276558	19.1853	352775	77.2789	3053889	16.7553	590525	71.7301	8592102	46.994	839713	71.5209	10407641	49.4378	133691	73.7451	4340878	25.9877	608119	70.2308	4290025	38.0291	199907	84.9172	750287	6.40897	72315	74.0636	5556415	78.6258	254450	93.6845	5653029	42.4439	284358	88.2162	5695677	43.7557
Total Reads	437843		21489940		393496		19241437		560088		17078443		456496		18226455		823260		18283401		1174080		21051982		181288		16703583		865887		11280903		235414		11706826		97639		7066911		271603		13318812		322342		13017008

## Sheet: Sheet4
	Equine muscle tissue_1		Equine muscle tissue_3		Equine muscle tissue_8		Equine muscle tissue_10		Equine colon tissue_2		Equine colon tissue_4		Equine colon tissue_6		Equine colon tissue_12		Equine liver tissue_5		Equine liver tissue_7		Equine liver tissue_9		Equine liver tissue_11
	Unique sRNAs	Total Reads	Unique sRNAs	Total Reads	Unique sRNAs	Total Reads	Unique sRNAs	Total Reads	Unique sRNAs	Total Reads	Unique sRNAs	Total Reads	Unique sRNAs	Total Reads	Unique sRNAs	Total Reads	Unique sRNAs	Total Reads	Unique sRNAs	Total Reads	Unique sRNAs	Total Reads	Unique sRNAs	Total Reads
Exon antisense	0.0194134	0.000423454	0.0304959	0.000795159	0.0394581	0.00155752	0.0394308	0.00153623	0.0720307	0.00367546	0.0599618	0.00422288	0.0849477	0.000951892	0.0428462	0.00371424	0.0344075	0.00080295	0.0532574	0.000891479	0.0184092	0.000435474	0.0331946	0.000852731
Exon sense	2.52693	0.0572221	10.0047	0.250912	11.7332	0.459029	12.8321	0.394619	15.8169	0.954647	17.6963	1.72033	3.3786	0.0413564	16.4304	2.21096	4.04097	0.0876497	3.15857	0.0496256	0.574736	0.0132219	2.97045	0.0811246
Intron antisense	0.265392	0.0184179	0.473194	0.0212354	0.381012	0.0230525	0.493104	0.0293913	0.562277	0.0379579	0.757103	0.125266	0.62056	0.0111413	0.745825	0.144687	0.242127	0.0108227	0.369729	0.0114619	0.102355	0.00382166	0.208474	0.0077514
Intron sense	0.888903	0.336678	1.26456	0.298398	1.18981	0.254883	1.69618	0.273125	2.22785	0.72754	2.46269	0.699459	1.99241	1.01075	1.87992	0.886356	1.00206	0.942698	1.68375	1.34775	0.417521	0.417868	0.717561	0.431927
miRNA	0.569154	77.5984	0.502165	75.4868	0.335662	77.9401	0.383355	81.3352	0.337075	44.4634	0.240614	40.2249	1.75522	71.3423	0.32614	40.814	0.935798	90.8633	2.50515	18.4518	0.738946	56.7296	0.620459	53.5197
rRNA	10.0867	0.815158	8.73605	0.988429	3.33162	0.467262	3.0445	0.241643	3.5708	1.35307	2.80662	2.49029	12.2843	0.891863	3.94035	1.29262	3.53462	0.336445	11.0058	0.651176	2.49261	0.126738	2.35123	0.160651
repeat	0.538778	0.0207492	0.730122	0.0233039	0.895216	0.0420003	1.1367	0.0436892	1.35133	0.0923461	1.4706	0.125105	1.08446	0.017607	1.30109	0.133571	0.657565	0.0253015	1.08358	0.0200512	0.278716	0.0135598	0.617977	0.0251824
scRNA	0.0767398	0.107069	0.0602293	0.0303408	0.0471355	0.0309454	0.0525744	0.0302308	0.055511	0.448647	0.0433531	0.262626	0.177066	0.154051	0.0561274	0.189311	0.126161	0.112302	0.227368	0.0840537	0.0751096	0.0345226	0.0741449	0.0509871
snRNA	0.279781	0.0466079	0.203306	0.0397683	0.268529	0.018901	0.235051	0.0114559	0.403032	0.090749	0.267443	0.0863909	0.448458	0.0238811	0.389889	0.0905069	0.338977	0.0238237	0.483413	0.0269425	0.153533	0.0107667	0.238256	0.0147423
snoRNA	0.264022	0.0312704	0.189837	0.0154978	0.173723	0.0268526	0.168676	0.0147862	0.284114	0.112069	0.192661	0.0788857	0.521822	0.0702723	0.283178	0.117624	0.600219	0.124081	0.761991	0.0974259	0.322898	0.0564765	0.342804	0.0895521
srpRNA	0.0778818	0.0102606	0.069124	0.0265157	0.076238	0.029224	0.0545459	0.00707214	0.107864	0.135533	0.0767409	0.202	0.197476	0.00631002	0.0716029	0.0981836	0.0849567	0.00486041	0.20586	0.00543377	0.0493367	0.00141905	0.0428117	0.00569255
tRNA	6.56445	2.82756	5.01276	4.15942	3.3634	1.52089	2.58491	0.863487	3.7241	4.5864	2.40495	4.57692	3.70957	0.441839	4.30183	15.9894	3.48492	1.05893	4.39783	0.627558	1.0913	0.147611	3.5664	1.85622
Unknown	77.8418	18.1302	72.7235	18.6586	78.165	19.1853	77.2789	16.7553	71.7301	46.994	71.5209	49.4378	73.7451	25.9877	70.2308	38.0291	84.9172	6.40897	74.0636	78.6258	93.6845	42.4439	88.2162	43.7557

## Sheet: 논문용
Table_S2: Distribution of the genome-mapped sequence reads in small RNA libraries
	Equine muscle samples								Equine colon samples								Equine liver samples
Category	Unique sRNAs	Total Reads	Unique sRNAs	Total Reads	Unique sRNAs	Total Reads	Unique sRNAs	Total Reads	Unique sRNAs	Total Reads	Unique sRNAs	Total Reads	Unique sRNAs	Total Reads	Unique sRNAs	Total Reads	Unique sRNAs	Total Reads	Unique sRNAs	Total Reads	Unique sRNAs	Total Reads	Unique sRNAs	Total Reads
Exon antisense	85 (0.02%)	91 (0.00%)	120 (0.03%)	153 (0.00%)	221 (0.04%)	266 (0.00%)	180 (0.04%)	280 (0.00%)	593 (0.07%)	672 (0.00%)	704 (0.06%)	889 (0.00%)	154 (0.08%)	159 (0.00%)	371 (0.04%)	419 (0.00%)	81 (0.03%)	94 (0.00%)	52 (0.05%)	63 (0.00%)	50 (0.02%)	58 (0.00%)	107 (0.03%)	111 (0.00%)
Exon sense	11064 (2.53%)	12297 (0.06%)	39368 (10.00%)	48279 (0.25%)	65716 (11.73%)	78395 (0.46%)	58578 (12.80%)	71925 (0.39%)	130214 (15.78%)	174542 (0.95%)	207769 (17.70%)	362164 (1.72%)	6125 (3.38%)	6908 (0.04%)	142269 (16.43%)	249416 (2.21%)	9513 (4.04%)	10261 (0.06%)	3084 (3.16%)	3507 (0.02%)	1561 (0.57%)	1761 (0.01%)	9575 (2.97%)	10560 (0.08%)
Intron antisense	1162 (0.27%)	3958 (0.02%)	1862 (0.47%)	4086 (0.02%)	2134 (0.38%)	3937 (0.02%)	2251 (0.49%)	5357 (0.03%)	4629 (0.56%)	6940 (0.04%)	8889 (0.76%)	26371 (0.13%)	1125 (0.62%)	1861 (0.01%)	6458 (0.75%)	16322 (0.14%)	570 (0.24%)	1267 (0.01%)	361 (0.37%)	810 (0.00%)	278 (0.10%)	509 (0.00%)	672 (0.21%)	1009 (0.01%)
Intron sense	3892 (0.89%)	72352 (0.34%)	4976 (1.26%)	57416 (0.30%)	6664 (1.19%)	43530 (0.25%)	7743 (1.70%)	49781 (0.27%)	18341 (2.22%)	133019 (0.73%)	28914 (2.46%)	147250 (0.70%)	3612 (1.99%)	168831 (1.01%)	16278 (1.88%)	99989 (0.89%)	2359 (1.00%)	110360 (0.60%)	1644 (1.68%)	95244 (0.51%)	1134 (0.42%)	55655 (0.42%)	2313 (0.72%)	56224 (0.43%)
miRNA	2492 (0.57%)	16675841 (77.60%)	1976 (0.50%)	14524748 (75.49%)	1880 (0.34%)	13310949 (77.94%)	1750 (0.38%)	14824532 (81.34%)	2775 (0.34%)	8129415 (44.46%)	2825 (0.24%)	8468135 (40.21%)	3182 (1.76%)	11916716 (71.34%)	2824 (0.33%)	4604185 (40.81%)	2203 (0.94%)	10637210 (57.62%)	2446 (2.51%)	1303975 (69.34%)	2007 (0.74%)	7555711 (56.73%)	2000 (0.62%)	6966659 (53.52%)
rRNA	44164 (10.90%)	175177 (0.82%)	34376 (8.74%)	190188 (0.99%)	18660 (3.33%)	79801 (0.47%)	13898 (3.04%)	44043 (0.24%)	29397 (3.56%)	247387 (1.35%)	32952 (2.81%)	524256 (2.49%)	22270 (12.28%)	148973 (0.89%)	34119 (3.94%)	145819 (1.29%)	8321 (3.53%)	39387 (0.21%)	10746 (11.01%)	46018 (0.24%)	6770 (2.48%)	16880 (0.13%)	7579 (2.35%)	20912 (0.16%)
repeat	2359 (0.54%)	4459 (0.02%)	2873 (0.73%)	4484 (0.02%)	5014 (0.90%)	7173 (0.04%)	5189 (1.14%)	7963 (0.04%)	11125 (1.35%)	16884 (0.09%)	17266 (1.47%)	26337 (0.13%)	1966 (1.08%)	2941 (0.02%)	11266 (1.30%)	15068 (0.13%)	1548 (0.66%)	2962 (0.02%)	1058 (1.08%)	1417 (0.01%)	757 (0.28%)	1806 (0.01%)	1992 (0.62%)	3278 (0.03%)
scRNA	336 (0.08%)	23009 (0.11%)	237 (0.06%)	5838 (0.03%)	264 (0.05%)	5285 (0.03%)	240 (0.05%)	5510 (0.03%)	457 (0.06%)	82028 (0.45%)	509 (0.04%)	55288 (0.26%)	321 (0.18%)	25732 (0.15%)	486 (0.06%)	21356 (0.19%)	297 (0.13%)	13147 (0.07%)	222 (0.23%)	5940 (0.03%)	204 (0.07%)	4598 (0.03%)	239 90.07%)	6637 (0.05%)
snRNA	1225 (0.28%)	10016 (0.05%)	800 (0.20%)	7652 (0.04%)	1504 (0.27%)	3228 (0.02%)	1073 (0.24%)	2088 (0.01%)	3318 (0.40%)	16592 (0.09%)	3140 (0.27%)	18187 (0.09%)	813 (0.45%)	3989 (0.02%)	3376 (0.39%)	10210 (0.09%)	798 (0.34%)	2789 (0.02%)	472 (0.48%)	1904 (0.01%)	417 (0.15%)	1434 (0.01%)	768 (0.24%)	1919 (0.01%)
snoRNA	1156 (0.26%)	6720 (0.03%)	747 (0.19%)	2982 (0.02%)	973 (0.17%)	4586 (0.03%)	770 (0.17%)	2695 (0.01%)	2339 (0.28%)	20490 (0.11%)	2262 (0.19%)	16607 (0.08%)	946 (0.52%)	11738 (0.07%)	2452 (0.28%)	13269 (0.12%)	1413 (0.60%)	14526 (0.08%)	744 (0.76%)	6885 (0.04%)	877 (0.32%)	7522 (0.06%)	1105 (0.34%)	11657 (0.09%)
srpRNA	341 (0.08%)	2205 (0.01%)	272 (0.07%)	5102 (0.03%)	427 (0.08%)	4991 (0.03%)	249 (0.05%)	1289 (0.01%)	888 (0.11%)	24780 (0.14%)	901 (0.08%)	42525 (0.20%)	358 (0.20%)	1054 (0.01%)	620 (0.07%)	11076 (0.10%)	200 (0.08%)	569 (0.00%)	201 (0.21%)	384 (0.00%)	134 (0.05%)	189 (0.00%)	138 (0.04%)	741 (0.01%)
tRNA	28742 (6.56%)	607640 (2.83%)	19725 (5.01%)	800333 (4.16%)	18838 (3.36%)	259744 (1.52%)	11800 (2.58%)	157383 (0.86%)	30659 (3.72%)	838550 (4.59%)	28236 (2.40%)	963532 (4.58%)	6725 (3.71%)	73803 (0.44%)	37249 (4.30%)	1803749 (15.99%)	8204 (3.48%)	123967 (0.67%)	4294 (4.40%)	44349 (0.24%)	2964 (1.45%)	19660 (0.15%)	11496 (3.57%)	241624 (1.86%)
Unknown	340825 (77.84%)	3896175 (18.13%)	286164 (72.72%)	3590176 (18.66%)	437793 (78.17%)	3276558 (19.19%)	352775 (77.28%)	3053889 (16.76%)	590525 (71.56%)	8592102 (46.99%)	839713 (71.52%)	10407641 (49.24%)	133691 (73.75%)	4340878 (25.99%)	608119 (70.23%)	4290025 (38.03%)	199907 (84.92%)	750287 (40.65%)	72315 (74.06%)	5556415 (29.57%)	254450 (93.34%)	5653029 (42.44%)	284358 (88.22%)	5695677 (43.76%)
Total Reads	437843 (100%)	21489940 (100%)	393496 (100%)	19241437 (100%)	560088 (100%)	17078443 (100%)	456496 (100%)	18226455 (100%)	823260 (100%)	18283401 (100%)	1174080 (100%)	21051982 (100%)	181288 (100%)	16703583 (100%)	865887 (100%)	11280903 (100%)	235414 (100%)	18461826 (100%)	97639 (100%)	18793891 (100%)	272603 (100%)	13318812 (100%)	322342 (100%)	13017008 (100%)
